1 **Genome-wide analysis of repetitive elements**  
2 **associated with gene regulation**  
3 **Repetitive elements and gene regulation**

4 **Lu Zeng<sup>1, 2, \*</sup>, Stephen M. Pederson<sup>2, \*</sup>, Danfeng Cao<sup>1</sup>, Zhipeng Qu<sup>2</sup>,**  
5 **Zhiqiang Hu<sup>1</sup>, David L. Adelson<sup>2&</sup>, and Chaochun Wei<sup>1&</sup>**

6 <sup>1</sup>School of Life Sciences and Biotechnology

7 Shanghai Jiao Tong University

8 Shanghai

9 P. R. China

10 <sup>2</sup>School of Biological Sciences

11 The University of Adelaide

12 Adelaide, SA

13 Australia

14 **RUNNING TITLE: Repeats and Gene Regulation**

15 \*These authors contributed equally to this work

16 &To whom correspondence should be addressed.

17 <sup>1</sup> Tel: (86) (21) 34204348

18 Fax: (86)(21)34204348

19 Email: [ccwei@sjtu.edu.cn](mailto:ccwei@sjtu.edu.cn)

20 <sup>2</sup>Tel: +61 8 83137555

21 Fax: +61 8 83133262

22 Email: [david.adelson@adelaide.edu.au](mailto:david.adelson@adelaide.edu.au)

23 **ABSTRACT**

24 **Nearly half of the human genome is made up of transposable elements (TEs) and**  
25 **evidence supports a possible role for TEs in gene regulation. Here, we have integrated**  
26 **publicly available genomic, epigenetic and transcriptomic data to investigate this**  
27 **potential function in a genome-wide manner. Results show that although most TE**  
28 **classes are primarily involved in reduced gene expression, Alu elements are associated**  
29 **with up regulated gene expression. This is consistent with our previously published**  
30 **work which showed that intronic Alu elements are capable of generating alternative**  
31 **splice variants in protein-coding genes, and further illustrates how Alu elements can**  
32 **alter protein function or gene expression level. Furthermore, non-coding regions were**  
33 **found to have a great density of TEs within regulatory sequences, most notably in**  
34 **repressors. Our exhaustive analysis of recent datasets has extended and updated our**  
35 **understanding of TEs in terms of their global impact on gene regulation, and indicates**  
36 **a significant association between repetitive elements and gene regulation.**

37 **Keywords:** Transposable elements/Epigenetic/Gene expression/Gene ontology/Regulatory  
38 elements.

39

40 **INTRODUCTION**

41 Repetitive elements are similar or identical DNA sequences present in multiple copies  
42 throughout the genome. The majority of the repetitive sequences in the human genome are

43 derived from transposable elements (TEs) [1, 2] that can move within the genome,  
44 potentially giving rise to mutations or altering genome size and structure. Typical eukaryotic  
45 genomes contain millions of copies of transposable elements (TEs) and other repetitive  
46 sequences. TEs fall into two major classes: those moving/replicating via a copy and paste  
47 mechanism and an RNA intermediate (retrotransposons) and those moving via direct cut  
48 and paste of their DNA sequences (DNA transposons). Retrotransposons can be subdivided  
49 into two groups: Those with long terminal repeats (LTRs), and those without LTRs (non-  
50 LTRs). Human LTR elements are related to endogenous retroviruses (HERVs), which along  
51 with similar elements account for nearly 8% of the human genome [3]. Non-LTR  
52 retrotransposons include two sub-types: autonomous long interspersed elements (LINEs)  
53 and non-autonomous short interspersed elements (SINEs), which are dependent on  
54 autonomous elements for their replication; both LINEs and SINEs are widespread in  
55 eukaryotic genomes. LINE-1 (long interspersed element 1) and Alu elements are two TEs  
56 that belong to non-LTR retrotransposons, which account for approximately one-quarter of  
57 the human genome [1].

58 A number of existing studies have shown that TEs can influence host genes by providing  
59 novel promoters, splice sites or post-transcriptional modification to re-wire different  
60 developmental regulatory and transcriptional networks [4-6]. TEs tend to regulate gene  
61 expression through several mechanisms [6-9]. For example, the expression levels of protein  
62 coding genes containing repetitive elements are significantly associated with the number of  
63 repetitive elements in those genes in rodents [7]. L1 family repeats show a stronger negative

64 correlation with expression levels than the gene length [10], and the presence of L1  
65 sequences within genes can lower transcriptional activity [11]. Moreover, TEs have been  
66 shown to influence gene expression through non-coding RNAs, resulting in the reduction or  
67 silencing of gene expression [12]. For example, the expression of long intergenic non-  
68 coding RNAs (lincRNAs) was strongly correlated with HERVH transcriptional regulatory  
69 signals [13]. Past studies have found that TEs have contributed to nearly half of the active  
70 regulatory elements of the human genome [14], by altering gene promoters and creating  
71 alternative promoters and enhancers to regulate gene activity [15-17]. According to previous  
72 research, 60% of TEs in both human and mouse were located in intronic regions and all TE  
73 families in human and mouse can exonize, supporting the view that TEs may create new  
74 genes and exons by promoting the formation of novel or alternative transcripts [18, 19]. The  
75 association between repetitive elements and RNAs has also been investigated. For example,  
76 Alu elements in lincRNAs can lead to *STAU1* mediated mRNA decay by duplexing with  
77 complementary Alu elements in the 3'UTRs of mRNAs [20], and the insertion of TEs may  
78 also drive the evolution of lincRNAs and alter their biological functions [13].

79

80 In this paper, TEs in the human genome were analyzed using genome-wide datasets  
81 associated with gene regulation. These datasets enabled an assessment of the association of  
82 TEs with chromatin states, as marked by histone modification within six human cell lines,  
83 lincRNAs, Gene Ontology (GO) enrichment, as well as overall transcriptome profiles.  
84 Whilst our analysis is limited to a general comparison of repeat families, as opposed to

85 specific repeat elements, we found clear associations between repeat families and gene  
86 regulation, both within regulatory regions and in the generation of splice variants.

87

## 88 **RESULTS**

### 89 **The distribution of repetitive elements in the human genome**

90 Initially, we compared the distribution of repetitive elements in the human genome. We  
91 found many repetitive elements overlapped with gene models from the human RefSeq gene  
92 datasets, and their distributions with respect to components of the gene model are shown in  
93 Fig 1. Most repetitive elements were found in non-coding intervals such as 5'UTR introns,  
94 CDS introns, 3'UTR introns and intergenic regions. In regards to clade-specific repeats,  
95 these were found more often in introns and intergenic regions than in 3'UTR exons or  
96 5'UTR exons (Fig 1).

### 97 **Fig 1. Distribution of repetitive elements overlapping with different human gene** 98 **regions.**

99 Gene regions are shown on the x-axis and the y-axis shows the percentages of the genomic  
100 regions containing repetitive elements. Human-specific repeats were those annotated with  
101 “Homo sapiens” or “primates” as their origin (see Table S6 for the list of human-specific  
102 repeat classes). The remaining repetitive regions were categorized as shared repeats.

### 103 **Role of transposable elements in gene regulation by chromatin states.**

104 Based on previous studies, TE-derived sequences can provide transcription factor binding

105 sites, promoters and enhancers, and insulators/silencers [5, 21, 22]. To look for enrichment of  
106 TEs within regulatory elements, we looked at the proportions of nucleotides with a TE in each  
107 of the six defined regulatory elements [23] as they appear in different components of the gene  
108 model. This represents the probability of a given nucleotide within an regulatory element  
109 (RE) being from a transposable element (TE), i.e.  $p(\text{TE}|\text{RE})$  (see Methods for details) across  
110 the set of genic regions (Fig 2A). Confidence intervals for the pairwise differences in  
111  $p(\text{TE}|\text{RE})$  are shown in Fig 2B, and these reveal that for all regulatory elements, TEs are more  
112 sparsely distributed across regulatory elements within CDS exons than across regulatory  
113 elements in all other genic regions. Likewise, regulatory elements in the 3'UTR were more  
114 sparsely populated with TEs in comparison to those in other regions, with the sole exception  
115 of Active Promoters in the 5'UTR, Conversely, Intergenic Polycomb Repressed Regions were  
116 enriched for TEs in comparison to these elements in other components of gene models.  
117 Finally, Intergenic Insulators were also found to be enriched for TEs in comparison to  
118 Insulators in all other components of gene models, except for those in 5'UTRs.

119 **Fig 2. Analysis of the co-occurrence of Transposable Elements and Regulatory**  
120 **Elements across multiple genomic regions** A) Probability estimates are those of an  
121 individual base within each region being part of a Regulatory Element, i.e.  $p(\text{RE})$ , or a  
122 Transposable Element within a Regulatory Element, i.e.  $p(\text{TE}|\text{RE})$ . Error bars indicate  $\pm 1$   
123 Std. Error as calculated on the logit-transformed values. B)  $1 - \alpha$  Confidence Intervals for  
124 the difference between logit-transformed probabilities  $p(\text{TE}|\text{RE})$ , adjusted for multiple  
125 comparisons at the level  $\alpha = 0.05/6$  within each RE (60). Intervals highlighted in red are

126 those do not contain zeros and are indicative of a significant difference between the two  
127 values.

128 **Different classes of transposable elements and their associations with chromatin state.**

129 In order to systematically characterize the role of different repeat classes within the defined  
130 regulatory elements, the distribution of regulatory elements within specific classes of TEs  
131 were investigated, using the estimates of  $p(\text{RE}|\text{TE})$  (See Methods). Out of all six TE classes  
132 investigated (Alu, L1, L2, LTR, MIR and DNA), L1 elements were consistently found with  
133 the lowest probability of a nucleotide also belonging to a regulatory element (Fig 3A). It  
134 was also clear that regulatory elements had the highest probability of being exapted as Weak  
135 Enhancer and Polycomb Repressed Regions compared to the other elements. Confidence  
136 intervals were used to perform pair-wise comparisons on the probability of containing an  
137 RE for each TE type. No difference was found between ancestral and recent L1 elements for  
138 any RE (Fig 3B), and L1s were confirmed as containing a significantly lower proportion of  
139 their content as an RE in comparison to all other TEs. The notable exceptions to this were  
140 Polycomb Repressed Regions, where little difference was found in their rate of occurrence  
141 between any TE types, beyond comparative enrichment in MIR elements compared to L1s.  
142 MIR elements were more likely to contain a strong enhancer than all other elements, except  
143 L2 and DNA elements. DNA elements were also more likely to contain an Insulator than  
144 Alu elements, as well as the previously mentioned L1 elements.

145 **Fig 3. Analysis of the occurrence of Regulatory Elements within specific classes of**

146 **Transposable Elements.** A) Probability estimates are for an individual base within each

147 type of element belonging to each of the regulatory elements, i.e.  $p(\text{RE}|\text{TE})$ . Error bars

148 indicate  $\pm 1$  Std. Error as calculated on the logit-transformed values. B)  $1 - \alpha$  Confidence

149 Intervals for the difference between logit-transformed probabilities  $p(\text{RE}|\text{TE})$ , adjusted for

150 multiple comparisons at the level  $\alpha = 0.05/6$  within each RE (60). Intervals highlighted in

151 red are those do not contain the zero and are indicative of a significant difference between

152 the two values

153 **Are Regulatory Elements containing TEs abundantly present in long intergenic non-coding**

154 **RNAs?**

155 TEs are a source of endogenous small RNAs in animals and plants, and endogenous small

156 RNAs are considered to be functionally significant in gene regulation [24]. Furthermore, it

157 is well known that many Alu elements have inserted into long non-coding RNAs and

158 mRNAs, which can cause mRNA decay via short imperfect base-pairing [25]. We expanded

159 this to see whether different classes of TEs had any significant associations with non-coding

160 RNA, especially lincRNAs.

161 Unsurprisingly, we found that TEs consistently made up a lower proportion of nucleotides

162 in CDS-exons across all regulatory elements, when compared to CDS-introns, lincRNA

163 exons and lincRNA introns (Fig 4). An additional enrichment for TEs in Active Promoters

164 within lincRNA introns was also observed in comparison to all other regions investigated in

165 this stage of the analysis. Weak Promoters in both lincRNA introns and CDS introns also



166 showed TE enrichment compared to both types of exonic regions. The observation that  
167 >30% of nucleotides from many of the regulatory elements were derived from TEs was also  
168 quite striking. In particular, the observation that lincRNA exonic regions contained the  
169 highest RE density for Polycomb Repressed Regions (Fig 4), with a nearly a third of these  
170 nucleotides being derived from TEs, suggests that the presence of transposable elements in  
171 lincRNA exons may be strongly linked to gene regulation.

172 **Fig 4. Analysis of the co-occurrence of Transposable Elements and Regulatory**  
173 **Elements across non-coding regions** A) Probability estimates for an individual base within  
174 each type of non-coding region being part of a Regulatory Element  $p(\text{RE})$  or a Transposable  
175 Element within each Regulatory Element  $p(\text{TE}|\text{RE})$ . Error bars indicate  $\pm 1$  Std. Error as  
176 calculated on the logit-transformed values. B)  $1 - \alpha$  Confidence Intervals for the difference  
177 between logit-transformed probabilities  $p(\text{TE}|\text{RE})$ , adjusted for multiple comparisons at the  
178 level  $\alpha = 0.05/6$  within each RE (60). Intervals highlighted in red show significant  
179 pairwise differences (confidence intervals do not cross the 0 difference value).

#### 180 **Associations of TEs with gene model features and gene expression**

181 Next, we summarized the overall distribution of transposable elements within various  
182 components of the gene model, by finding genes containing TEs across single or multiple  
183 components (Fig S1, Table 1), and genes containing one or more types of TEs (Fig S2,  
184 Table 2). We further examined the relationship between gene length and which components  
185 of a gene contain a TE (Fig S3), as well as the relationship between gene length and the  
186 presence of a specific type of TE (Fig S4), using a Wilcoxon Test (Tables S2 & S3) in both

187 cases. We found that only genes with TEs in the 3'UTR or within multiple genic regions  
188 showed a bias towards longer length, whilst for TEs exclusively within the proximal  
189 promoter or 5'UTR there was a bias towards shorter genes (Fig S3; Table S2). When  
190 assessing the relationship between gene length and the presence of a specific TE class, the  
191 length of genes with Alu, L2 or MIR elements alone were very similar to genes with no TE,  
192 whilst L1 and LTR elements showed a bias towards shorter genes, and the presence of  
193 multiple elements biased towards longer genes (Fig S4; Table S3).

194 **Table 1:** Total counts of elements within each genomic region, along with the number of  
195 genes with Transposable Elements in one region only.

| <b>Region</b>            | <b>Total</b> | <b>Elements in Single Regions</b> | <b>Proportion</b> |
|--------------------------|--------------|-----------------------------------|-------------------|
| <b>Proximal Promoter</b> | 9462         | 4835                              | 0.511             |
| <b>5'UTR</b>             | 4913         | 1528                              | 0.311             |
| <b>CDS</b>               | 655          | 131                               | 0.200             |
| <b>3'UTR</b>             | 5640         | 1766                              | 0.313             |

196 **Table 2:** Total counts of each TE element, along with how many are found in isolation, i.e.  
197 in genes with no other elements.

| <b>Element Type</b> | <b>Total</b> | <b>Found in Isolation</b> | <b>Proportion</b> |
|---------------------|--------------|---------------------------|-------------------|
| <b>Alu</b>          | 9460         | 2199                      | 0.232             |
| <b>L1</b>           | 5111         | 539                       | 0.105             |
| <b>L2</b>           | 5863         | 687                       | 0.117             |
| <b>LTR</b>          | 4089         | 363                       | 0.089             |
| <b>MIR</b>          | 7638         | 1423                      | 0.186             |

198

199 **Effects on the probability of a gene being detected as expressed due to the presence of**  
200 **a TE across the different component of the gene model**

201 As chromatin states are not always indicative of changes in transcriptional activity, we  
202 investigated any effects on human gene expression due to the presence of specific TE  
203 classes within each of the four regulatory regions, i.e., Proximal Promoter, 5'UTR, CDS and  
204 3'UTR. However, as TEs are far less frequent in CDS regulatory regions with the vast  
205 majority co-occurring with other TEs (Figure S1), the subsequent analysis instead focused  
206 on the other three regions. Six human tissue transcriptome datasets (adipose, brain, kidney,  
207 liver, skeletal muscle and testes tissue) were selected from the Illumina BodyMap2 dataset  
208 for this analysis, and global patterns of gene expression were investigated based on the  
209 presence or absence of each TE within each of these three genic regions.

210 The weighted bootstrap method was applied to both the probability of a gene being detected  
211 as expressed (Fig 5A), and to the overall expression levels for those genes detected as  
212 expressed (Fig 5B). This revealed that Alu elements are commonly associated with a higher  
213 probability of expression when located in either the 5'UTR or the 3'UTR across the  
214 majority of tissues. In contrast to the presence of an Alu, the presence of L1 elements in the  
215 Proximal Promoter showed a negative impact on the probability of a gene being detected as  
216 expressed in 3 of the 6 tissues, with the remaining tissues being directionally consistent and  
217 quite likely to be Type II errors (Supplementary Fig S6A).

218 **Fig 5. Effects of the presence of each TE in each genomic region.** A) Confidence  
219 Intervals for the difference in the probability of a gene being detected as expressed due to  
220 the presence of each TE in each genic region. B) Confidence Intervals for the difference in  
221 mean log<sub>2</sub>(TPM) counts. For both A) and B), Confidence Intervals were obtained using the  
222 weighted bootstrap and are  $1 - \alpha/m$  intervals, where  $\alpha = 0.05$  and  $m = 90$  as the total  
223 number of intervals presented. Dots represent the median value from the bootstrap  
224 procedure, whilst the vertical line indicates zero. Intervals which do not contain zero are  
225 coloured red, and indicate a rejection of the null hypothesis,  $H_0: \Delta\theta = 0$ , where  $\theta$  represents  
226 the parameter of interest.

227 **Effects on the levels of gene expression due to the presence of a TE in each component**  
228 **of the gene model.**

229 Again using the weighted bootstrap approach to minimize any influence of co-occurring  
230 elements, the presence of an Alu in the 5'UTR was found to be associated with increased  
231 expression levels in five of the six tissues investigated (Fig 5B). Similarly, Alu elements in  
232 the Proximal Promoter were associated with increased expression in two of the tissues. Alu  
233 elements in 3'UTR were associated with elevated expression levels in the Kidney sample  
234 only. The presence of ion  
235 elements showed varying degrees of reduced gene expression across the tissues when  
236 located in the 3'UTR only. It was also noted that whilst strongly controlling the family-wise  
237 Type-I error rate (FWER), the adjusted confidence intervals will result in an increase in the

238 Type-II error rate where true differences are not able to be detected. As such, the point at  
239 which the confidence intervals would include zero was found and taken as a proxy for the p-  
240 value. Confidence intervals based on these p values to an FDR of 0.05 are shown in  
241 Supplementary Figure S6 with the p values given in Supplementary Table S4. It is clear  
242 from this additional approach that the role of TEs such as L1 elements in Proximal  
243 Promoters and 3'UTRs, LTR elements in 5'UTRs and many of the elements in the 3'UTR  
244 may have been considerably understated in this more conservative approach.

#### 245 **Analysis of genes with exapted or exonized TEs**

246 TEs may influence gene expression in different ways, thus we evaluated the possible  
247 functional effects of repetitive elements in the human genome, the six primary repeat classes  
248 were mapped to the human genome (<http://www.repeatmasker.org>). Genic regions  
249 (annotated using Gene Ontology) that overlapped with TEs were analyzed to assess the  
250 association of TEs with different gene functions.

251

252 The three fundamental GO categories are: cellular component, molecular function and  
253 biological process. Enrichment information for each GO category is listed in Supplementary  
254 Table S5. We discovered that for the biological process category (Fig 6, Table S5a), the  
255 predominant types of annotation were related to regulatory processes involving metabolic  
256 processes. This was consistent with the annotations for the cellular component terms, which  
257 were predominantly for intracellular/cytoplasmic structures (Fig S7, Table S5b). The  
258 molecular function terms had functions mainly associated with binding (Fig S8, Table S5c).

259 Using this same method, we also found that genes with protein coding exons containing  
260 Alus were enriched for the GO term “intracellular non-membrane-bounded organelle”.  
261 Interestingly, these exonization/exaptation events were found associated with splice variants  
262 when incorporating Alu sequences (Table S6 & Fig S9, S10).

263 **Fig 6. Enrichment of GO terms of genes containing TEs in promoter, 5'UTR and**  
264 **3'UTR regions.**

265 Enrichment of GO terms of genes containing TEs in “Biological Process”. Genes containing  
266 different types of repetitive elements in the proximal promoter regions are labeled as  
267 "Promoter with Repeats", and Genes containing repetitive elements in UTR regions are  
268 labeled as "5/3UTR with Repeats". Genes named “Combined Repeats” are the combined  
269 data from 3 regions we mentioned above. The darker the color, the greater the GO term  
270 enrichment as determined by FDR.

271 Moreover, according to our analysis of TEs and alternative splicing data, we found that  
272 2.98% of alternatively spliced transcripts contained TEs within protein coding exons (Table  
273 3). Alu and MIR were more likely to be involved in alternative splicing and exonization,  
274 which is consistent with previous studies showing that exonization of SINEs occurred in  
275 primates [26]. Based on our study, LINEs may also have contributed to these splice variant  
276 activities. This shows that exonization of TEs could potentially increase the coding and  
277 regulatory versatility of the transcriptome.

278 **Table 3.** The number of repeats in protein coding regions (CDS-exon) with alternative  
279 splicing. Repeats were counted only if they overlapped CDS-exon regions by at least 25  
280 bps.

| <b>Repeat Class</b>                      |            |            |           |           |            |            |                    |
|------------------------------------------|------------|------------|-----------|-----------|------------|------------|--------------------|
|                                          | <b>Alu</b> | <b>MIR</b> | <b>L1</b> | <b>L2</b> | <b>LTR</b> | <b>ERV</b> | <b>All repeats</b> |
| <b>TEs in CDS-exon<br/>containing AS</b> | 329        | 224        | 186       | 213       | 229        | 15         | 1,402              |

281

## 282 **DISCUSSION**

283 In this work, we have primarily analyzed the distribution of various classes of transposable  
284 elements, and their association with regulatory elements (active chromatin) and gene  
285 expression in the human genome. Based on the analysis of the TE distributions in genic  
286 regions and corresponding gene expression patterns, the presence of some TEs was found to  
287 be associated with changes in gene expression. Further, gene function as defined by GO  
288 term analysis differed depending on the TE insertion site within the gene. Finally, we  
289 looked at TEs present in ncRNAs, specifically lincRNAs, and found that repetitive elements  
290 were present at higher levels in lincRNAs than coding exons.

291 Considering the association between the location of TEs in genes, we found that genes had a  
292 greater proportion of sequence originating from TEs in the 5' and 3'UTRs compared to  
293 coding exons (Fig 2). This is not surprising considering the potential adverse effect of TE  
294 insertion in a protein coding sequence, but it is also relevant with respect to the known

295 regulatory functions within the UTRs [27, 28]. The repeat content for 5'UTR introns was  
296 comparable to other types of introns, but this may be significant in the context of  
297 transcriptional repression, where genes with shorter 5' UTR introns are expressed at higher  
298 levels [29, 30].

299 Furthermore, the presence of TEs in genomic regions that can be epigenetically modified to  
300 regulate transcription through active chromatin [31], was consistent with our findings that  
301 TEs have a potential role as regulators of gene expression. From our results (Fig 2), we  
302 found that some functional regions of active chromatin contained higher percentages of TEs,  
303 especially Polycomb Repressed Regions and Weak Enhancers. This fits with the existing  
304 theory of epigenetic silencing of TEs [31], since TEs in Polycomb Repressed Regions  
305 would inevitably be silenced, and was also consistent with the high repeat content of  
306 5'UTRs, which are also known to regulate gene expression [32]. Furthermore, it has been  
307 shown that TEs in 3'UTRs are associated with lower transcript abundance [33], and with the  
308 clear exception of Alu elements, we have presented further evidence of this. This suggests  
309 that exaptation of repetitive elements into regulatory regions is most often associated with  
310 repression of gene expression. The general theme of TEs having a role in transcriptional  
311 repression was further supported with lincRNAs, which are known to regulate gene  
312 expression through epigenetic mechanisms [34] and competition with transcription factors  
313 [25]. In our analysis, lincRNA exons were found to be clearly enriched for Polycomb  
314 Repressed Regions whilst the abundance of TEs within these regions was relatively  
315 consistent with both CDS and lincRNA introns (Fig 4). However, this overall enrichment



316 for repressed regions is consistent with previous research that lincRNAs containing TEs can  
317 reduce gene expression in many tissues and cell lines [13]. As different repeat classes were  
318 also found to be present at different levels in active chromatin or in specific regulatory  
319 regions, such as Polycomb Repressed Regions (Fig 3), this suggests a function with respect  
320 to gene expression.

321 Figures 5B and S6B summarize our findings with regard to gene expression, and indicate  
322 that Alu elements in 3'UTR, 5'UTR and proximal promoter regions are commonly  
323 associated with increased gene expression. Taken in addition with the increased probability  
324 of expression due to the presence of an Alu in the 5'UTR and 3'UTR (Fig 5A), these results  
325 support previous reports showing TEs such as Alus can be exapted as transcription factor  
326 binding sites [35-37], but are in contrast with reports concerning the direction of expression  
327 for human genes. We also found genes containing L1 elements were associated with  
328 decreasing gene expression (Fig 5), and that L1 elements were less prevalent in regulatory  
329 elements or active chromatin, when compared to other repeat classes (Fig 3). This makes  
330 intuitive sense as most L1 elements in the human genome are 5' truncated and lack  
331 promoter content compared to Alu elements [38]. This is also consistent with a previous  
332 study showing that highly and broadly expressed housekeeping genes can be distinguished  
333 by their TE content, with these genes being enriched for Alus and depleted for L1s [39].  
334 LTRs were found associated with repression of gene expression, which is in contrast to  
335 previous work that implicated LTRs as alternative promoters [40]. Anecdotally, it has been  
336 shown that an LTR in the first intron of the equine TRPM gene suppresses gene expression

337 by acting as an alternative poly-A site [41], and the insertion of LTRs in introns has been  
338 associated with premature termination of transcription [42], supporting the results presented  
339 here. L2 and MIR are ancient TE families conserved among mammals, and are regarded as  
340 inactive or fossil TE elements [43]. However, these TEs showed a level of association with  
341 reduced gene expression when located in 3'UTRs (Fig 5), which is also consistent with a  
342 previous finding on their ability to impact the evolution of gene 3' ends by containing cis-  
343 elements for modified polyadenylation [44].

344 In addition to potentially altering gene expression by insertion into regulatory elements, TEs  
345 may also be associated with specific functional characteristics of expressed protein coding  
346 genes. When we examined the functional annotation of repeat containing genes, we found  
347 that some functions were over-represented (Table S5). Perhaps the most interesting of these  
348 associations was that genes with Alu insertions were found to contribute to coding exons  
349 through alternative splice variants. One explanation of this observation is that Alu-induced  
350 alternative transcripts may result in nonsense mediated decay of alternative transcripts [45].  
351 Two examples of alternatively spliced genes of this type with implications for human  
352 disease are *DISC1* and *NOS3* (Table S6 and Fig S9 & S10). *DISC1* alternative transcripts  
353 are known to contribute to increased risk of schizophrenia [46, 47] and *NOS3* transcript  
354 variants are associated with cardiovascular disease phenotypes [48, 49]. Based on previous  
355 research, nearly 4% of protein-coding sequences include transposable elements, and one-  
356 third of them are Alu insertions [50]. Therefore, Alu exonization in protein-coding genes  
357 may play an important role in modifying gene expression.

358 In conclusion, while there are many publications implicating TEs in the regulation of  
359 individual genes, our work clarifies some previous uncertainties and resolves some  
360 contradictions, confirming that this role of TEs is significant across the genome. In general,  
361 most TEs would appear to be strongly associated with repression of gene expression, either  
362 through the 5'UTR or perhaps as components of lincRNA exons. However, the presence of  
363 Alus in 3'UTR and proximal promoter regions may act to increase gene expression. These  
364 results are consistent with some previous published research [10] and provide a new  
365 understanding of how repeats are associated with epigenetic regulation of gene expression.  
366 Finally, while exapted TEs may contribute to the generation of transcripts that undergo  
367 nonsense mediated decay as part of gene regulation, we speculate that they may also provide  
368 an opportunity for alternative splicing and novel exaptation. TEs therefore are important  
369 agents of change with respect to the evolution of gene expression networks.

370

## 371 **MATERIAL AND METHODS**

### 372 **Theoretical framework and methods**

373 We constructed pipelines to analyze the distribution of repetitive elements in different parts  
374 of the human genome. Repetitive elements overlapping with protein coding regions, non-  
375 coding regions and regulatory elements were identified. GO term over-representation and  
376 expression analyses were carried out for repetitive elements overlapping with protein-  
377 coding regions. The pipelines and related materials are described below.

### 378 **Tools used to develop pipelines for repetitive element analysis**

379 The identification and classification of TEs from the human genome was conducted by  
380 developing a pipeline with Perl, R [51], and BEDTools [52]. Perl was used to extract  
381 information from different datasets. R was used to build graphs to illustrate the repeat  
382 distribution in different genic regions, the identification of repetitive elements with respect  
383 to functional elements, GO term over-representation analysis and expression analysis of TEs.  
384 BED format file intersection was used to extract the overlapping regions between different  
385 datasets, with a lower limit of 25-bps. The UCSC Genome Browser [53, 54] was used to  
386 download genome sequence data and genome annotations including RefSeq genes. RSEM  
387 [55] was adopted to assemble RNA-Seq reads into transcripts and estimate their abundance  
388 (measured as transcripts per million (TPM)). Plots were generated using ggplot2 in R [56].

## 389 **Datasets**

390 **Genomes and annotations.** NCBI's Human genome and its annotation datasets (RefSeq  
391 hg19) [57] were downloaded from the UCSC Genome Browser [23, 53]. A total of 37,697  
392 human RefSeq transcripts were merged into 18,777 genes by taking the longest transcript(s)  
393 that represented each distinct gene locus. Repetitive elements were downloaded from the  
394 RepeatMasker (<http://www.repeatmasker.org>) track of the UCSC Genome Browser. All  
395 repetitive sequence intervals were also de-duplicated to deal with potential overlapping  
396 repeat annotations. Overall, there were 5,298,130 human repetitive elements which  
397 represented approximately 1.467Gb in the human genome.

398 **Regulatory element datasets from six human cell lines.** The regulatory element datasets  
399 from six human cell lines were downloaded from the UCSC Genome Browser. Each cell  
400 line dataset contained the annotation of six regulatory elements: 1) Active Promoters, 2)  
401 Weak Promoters, 3) Strong Enhancers, 4) Weak Enhancers, 5) Insulators and 6) Polycomb  
402 Repressed Regions. These regulatory element annotations were derived from different  
403 chromatin states that have been marked by histone methylation, acetylation and histone  
404 variants H2AZ, PolIII, and CTCF [23].

405 **Gene expression datasets from six human tissues.** Human RNA-seq data from the  
406 Illumina bodyMap2 transcriptome (Paired End reads only)  
407 (<http://www.ebi.ac.uk/ena/data/view/ERP000546>) dataset was used to measure the  
408 association between TEs and the expression levels of genes containing TEs in six tissues.

409 **The distribution of repetitive elements in the human genome.** To assess how human TEs  
410 were distributed in genes, we compared different genic regions containing TEs. Based on  
411 Repbase [58, 59] annotations identified by RepeatMasker (<http://www.repeatmasker.org>),  
412 repeat elements in human were divided into two categories: human-specific repeats, and  
413 repeats shared with different species. Human-specific repeats were those annotated with  
414 “Homo sapiens” or “primates” as their origin (See Table S6 for the list of human-specific  
415 repeat classes), whilst those remaining were categorized as shared repeats. Intergenic  
416 regions as well as the exons and introns within 5’UTR, CDS and 3’UTR regions from  
417 RefSeq genes [60] were then compared with these different categories of repeats. Next, we

418 generated the summarised distributions of repetitive elements overlapping these regions by  
419 calculating the proportions of bases belonging to repetitive elements within each of the  
420 combined sets of regions, i.e.:

$$proportion = \frac{total\ length\ of\ repeats\ in\ defined\ regions\ (bps)}{total\ length\ of\ defined\ regions\ (bps)} \quad (1)$$

421 The code repository for the above can be found at  
422 <https://github.com/UofABioinformaticsHub/RepeatElements>.

423 **The occurrence of transposable elements within regulatory regions.** We further explored  
424 the association between any TE and the regulatory elements defined above, by calculating  
425 the proportion of nucleotides within each of the five sets of genic regions (5'UTR, CDS-  
426 exon, CDS-intron, 3'UTR and Intergenic) that were part of a regulatory element for each of  
427 the six human cell lines. The proportion of nucleotides that were TEs within each regulatory  
428 element were also calculated for each genic region. All proportions were subsequently  
429 transformed using the logit function for model fitting across tissues (Table S1) using the  
430 model

$$y_{ijk} = \mu + \alpha_i + \beta_j + (\alpha\beta)_{ij} + \varepsilon_{ijk} \quad (2)$$

431 where  $y_{ijk}$  is the logit transformed proportions representing  $p(\text{TE}|\text{RE})$  across each genic  
432 region  $i$ , each regulatory element  $j$  and tissue  $k$ , such that  $\mu$  is the overall mean,  $\alpha_i$  is the  
433 effect due to each genic region,  $\beta_j$  is the effect due to each regulatory element with  $(\alpha\beta)_{ij}$   
434 representing any changes not accounted for in the first two terms. Tests for normality and  
435 homoscedasticity were performed using the Shapiro-Wilk test and Levene's test  
436 respectively. Where violations of homoscedasticity were found robust standard errors were

437 obtained using the sandwich estimator [61]. Confidence Intervals for pairwise comparisons  
438 were obtained as implemented in the R package *multcomp* [62] in order to control the Type  
439 I error at  $\alpha=0.05$  across the entire set of comparisons.

440 A specific TE analysis was then performed using six of the major human TE classes based  
441 on the Repbase classification system: Alu, L1, L2, MIR, LTR and DNA. L1 elements were  
442 further resolved into either ancestral (L1M, L1PB and L1PA subfamilies) or recent/clade-  
443 specific (L1HS subfamily), based on their Repbase annotations. The proportions of  
444 nucleotides within each TE type that were also regulatory elements were calculated giving  
445 tissue-specific estimates of  $p(\text{RE}|\text{TE})$ . Proportions were again transformed using the logit  
446 function, and the same analysis as above was performed.

#### 447 **Quality control and preprocessing of the gene expression data in different human**

448 **tissues.** RNA-seq reads of six human tissues were first assessed using FastQC software  
449 ([www.bioinformatics.babraham.ac.uk](http://www.bioinformatics.babraham.ac.uk)), to provide an overview of whether the raw RNA-  
450 Seq data contained any problems or biases before further analysis. Reads with poor-quality  
451 bases were trimmed (based on the results of FastQC with MINLEN set to 26) for subsequent  
452 data analysis. Table 4 showed the numbers of reads in raw RNA-Seq datasets and the  
453 statistics after the QC process by using Trimmomatic-0.32 [63]. Then, we built transcript  
454 reference sequences using rsem-prepare-reference [64] from Hg19 human RefSeq genes.  
455 The references were then input to rsem-calculate-expression [64] using default parameters  
456 for all 6 tissues to obtain TPM based expression values.

457 **Table 4.** Description of RNA-Seq datasets and QC results. Reads with poor-quality bases  
 458 were trimmed using FastQC (with MINLEN set to 26, HEADCROP set to 13 and  
 459 LEADING set to 15).

|                        | Raw Data<br>(Read Number) | High Quality reads (%) |                          |                          | Low<br>Quality<br>reads<br>(%) |
|------------------------|---------------------------|------------------------|--------------------------|--------------------------|--------------------------------|
|                        |                           | Both<br>Reads          | Forward<br>Only<br>Reads | Reverse<br>Only<br>Reads |                                |
| <b>Kidney</b>          | 8,039,733,700             | 78.72                  | 9.84                     | 4.87                     | 6.58                           |
| <b>Liver</b>           | 8,004,862,300             | 81.25                  | 8.11                     | 4.67                     | 5.96                           |
| <b>Brain</b>           | 7,351,304,700             | 69.31                  | 7.76                     | 12.86                    | 10.06                          |
| <b>Testes</b>          | 8,183,619,900             | 76.9                   | 9.88                     | 5.51                     | 7.71                           |
| <b>Adipose</b>         | 7,730,007,200             | 79.88                  | 9.74                     | 4.49                     | 5.89                           |
| <b>Skeletal Muscle</b> | 8,211,113,900             | 76.06                  | 12.12                    | 4.87                     | 6.94                           |

460

461 Proximal promoter regions were defined as 1,000bp upstream of the gene transcription start  
 462 sites based on the longest transcripts for each gene. Alu, MIR, L1, L2 and LTR repeat  
 463 regions were then identified within the proximal promoters, 5'UTR, CDS and 3'UTR  
 464 regions.

465 **The weighted bootstrap procedure for assessing the effects of a TE in each genic region.**

466 Many genes contain multiple transposable elements, with only a minority of genes  
 467 containing a single TE (Fig S2). In order to assess any effects on transcription due to the  
 468 presence of a single TE, a weighted bootstrap approach was devised. For a given TE within  
 469 each genic region within each individual tissue, the frequencies of co-occurring TEs and  
 470 combinations of TEs were noted. Uniform sampling probabilities were then used for the set  
 471 of genes containing a specific TE in a specific region, whilst sampling weights were  
 472 assigned to genes lacking the specific TE based on TE composition, such that the TE  
 473 content of the sampled set of reference genes matched that of the test set of genes, based on



474 the defined categories. Gene length was divided into 10 bins and these were included as an  
475 additional category when defining sampling weights. This ensured that two gene sets were  
476 obtained for each bootstrap iteration, which were matched in length and TE composition  
477 with the sole difference being the presence of the specific TE within each specific genic  
478 region (Figure S5). The mean difference in expression level, as measured by  $\log(\text{TPM})$ , and  
479 the difference in the proportions of genes detected as expressed were then used as the  
480 variables of interest in the bootstrap procedure. The bootstrap was performed on sets of  
481 1000 genes for 10,000 iterations using the proximal promoter as defined above, along with  
482 5'UTR and 3'UTRs. When comparing expression levels, genes with zero read counts were  
483 omitted prior to bootstrapping. In order to compensate for multiple testing considerations,  
484 confidence intervals were obtained across the  $m = 90$  tests at the level  $1 - \alpha/m$ , which is  
485 equivalent to the Bonferroni correction, giving confidence intervals which controlled the  
486 FWER at the level  $\alpha = 0.05$ . Approximate two-sided p-values were also calculated by  
487 finding the point at which each confidence interval crossed zero, and additional significance  
488 was determined by estimating the FDR on these sets of p-values using the Benjamini-  
489 Hochberg method.

490 **Long intergenic non-coding RNAs and TEs.** Annotations for 8,196 previously described  
491 putative human lincRNAs were downloaded [65] and the distribution of TEs within  
492 regulatory elements in lincRNA exons and introns was obtained using the same methods as  
493 above. The previously described regression models were then used to analyse this dataset.

494 **Association of functional elements with human repetitive elements.** To demonstrate the  
495 potential functional significance of repetitive elements, the Database for Annotation,  
496 Visualization and Integrated Discovery (DAVID) [66] was used to perform the GO  
497 classification. We first extracted Gene-IDs from overlapping regions between different gene  
498 categories (1000bp proximal promoter, 5'UTR, 3'UTR, and the combination of these 3  
499 regions) and TEs. These gene-lists were then submitted to the DAVID Functional  
500 Classification Tool. We chose the third level of GO terms to describe the over-represented  
501 functional terms for the three datasets and visualized the functional over-representation of  
502 overlapped genes using the R package *heatmap.2*. The p-value was applied in the GO  
503 analysis as the standard index to determine the degree of enrichment. The threshold for  
504 over-represented GO terms was set to an FDR (Benjamini-Hochberg method) less than 0.05.  
505 Protein-coding genes with Alus were also visualised with the UCSC genome browser  
506 (<http://genome.ucsc.edu/>) to compare their mRNA with various gene datasets and  
507 annotations.

508 **Association of alternative splicing and protein coding regions containing TEs.** In order  
509 to assess the relationship between transposable elements and exonization, an  
510 alternative splicing annotation dataset (SIB Alt-splicing) was downloaded from the  
511 UCSC Genome Browser (<http://genome.ucsc.edu/>). These data were generated from  
512 RefSeq genes, Genbank RNAs and ESTs that aligned to the human genome. A total of  
513 46,973 alternatively spliced transcripts were intersected with gene models containing  
514 transposable elements.

515

516 **ACKNOWLEDGEMENT**

517 The authors wish to thank Dan Kortschak, Atma Ivancevic, Joy Raison, Reuben Buckley  
518 and Sim Lin Lim for valuable discussions and critical reading of drafts.

519

520 **AUTHOR CONTRIBUTION**

521 DLA and CCW conceived, designed and managed the study. LZ collected the datasets,  
522 implemented the analysis pipeline, and analyzed the data. SMP analyzed the data. ZPQ, DFC,  
523 ZQH prepared datasets. LZ, DLA and CCW wrote and revised the manuscript. All authors  
524 reviewed and approved the final manuscript.

525

526 **CONFLICT OF INTEREST**

527 The author(s) declare that they have no competing interests.

528 **REFERENCES**

529 Lander ES, Linton LM, Birren B, Nusbaum C, Zody MC, et al. (2001) Initial  
530 sequencing and analysis of the human genome. *Nature* 409: 860-921.  
531 Smit AF (1999) Interspersed repeats and other mementos of transposable  
532 elements in mammalian genomes. *Current opinion in genetics & development*  
533 9: 657-663.  
534 Cordaux R and Batzer MA (2009) The impact of retrotransposons on human  
535 genome evolution. *Nature reviews Genetics* 10: 691-703.  
536 Kunarso G, Chia NY, Jeyakani J, Hwang C, Lu X, et al. (2010) Transposable  
537 elements have rewired the core regulatory network of human embryonic stem  
538 cells. *Nature genetics* 42: 631-634.  
539 Lynch VJ, Leclerc RD, May G and Wagner GP (2011) Transposon-mediated  
540 rewiring of gene regulatory networks contributed to the evolution of pregnancy  
541 in mammals. *Nature genetics* 43: 1154-1159.

- 542 Cowley M and Oakey RJ (2013) Transposable elements re-wire and fine-tune  
543 the transcriptome. *PLoS genetics* 9: e1003234.
- 544 Pereira V, Enard D and Eyre-Walker A (2009) The effect of transposable  
545 element insertions on gene expression evolution in rodents. *PloS one* 4: e4321.
- 546 Britten RJ (1996) DNA sequence insertion and evolutionary variation in gene  
547 regulation. *Proceedings of the National Academy of Sciences of the United*  
548 *States of America* 93: 9374-9377.
- 549 van de Lagemaat LN, Landry JR, Mager DL and Medstrand P (2003)  
550 Transposable elements in mammals promote regulatory variation and  
551 diversification of genes with specialized functions. *Trends in genetics : TIG* 19:  
552 530-536.
- 553 Jjingo D, Huda A, Gundapuneni M, Marino-Ramirez L and Jordan IK (2011)  
554 Effect of the transposable element environment of human genes on gene length  
555 and expression. *Genome biology and evolution* 3: 259-271.
- 556 Han JS, Szak ST and Boeke JD (2004) Transcriptional disruption by the L1  
557 retrotransposon and implications for mammalian transcriptomes. *Nature* 429:  
558 268-274.
- 559 Rebollo R, Romanish MT and Mager DL (2012) Transposable elements: an  
560 abundant and natural source of regulatory sequences for host genes. *Annual*  
561 *review of genetics* 46: 21-42.
- 562 Kelley D and Rinn J (2012) Transposable elements reveal a stem cell-specific  
563 class of long noncoding RNAs. *Genome biology* 13: R107.
- 564 Jacques PE, Jeyakani J and Bourque G (2013) The majority of primate-specific  
565 regulatory sequences are derived from transposable elements. *PLoS genetics* 9:  
566 e1003504.
- 567 Conley AB, Piriyaopngsa J and Jordan IK (2008) Retroviral promoters in the  
568 human genome. *Bioinformatics* 24: 1563-1567.
- 569 Medstrand P, Landry JR and Mager DL (2001) Long terminal repeats are used  
570 as alternative promoters for the endothelin B receptor and apolipoprotein C-I  
571 genes in humans. *The Journal of biological chemistry* 276: 1896-1903.
- 572 Franchini LF, Lopez-Leal R, Nasif S, Beati P, Gelman DM, et al. (2011)  
573 Convergent evolution of two mammalian neuronal enhancers by sequential  
574 exaptation of unrelated retroposons. *Proceedings of the National Academy of*  
575 *Sciences of the United States of America* 108: 15270-15275.
- 576 Sela N, Mersch B, Gal-Mark N, Lev-Maor G, Hotz-Wagenblatt A, et al. (2007)  
577 Comparative analysis of transposed element insertion within human and  
578 mouse genomes reveals Alu's unique role in shaping the human transcriptome.  
579 *Genome biology* 8: R127.
- 580 Piriyaopngsa J, Polavarapu N, Borodovsky M and McDonald J (2007)  
581 Exonization of the LTR transposable elements in human genome. *BMC*  
582 *genomics* 8: 291.

583 Hadjiargyrou M and Delihias N (2013) The Intertwining of Transposable  
584 Elements and Non-Coding RNAs. *International journal of molecular sciences* 14:  
585 13307-13328.

586 de Souza FS, Franchini LF and Rubinstein M (2013) Exaptation of transposable  
587 elements into novel cis-regulatory elements: is the evidence always strong?  
588 *Molecular biology and evolution* 30: 1239-1251.

589 Jjingo D, Conley AB, Wang J, Marino-Ramirez L, Lunyak VV, et al. (2014)  
590 Mammalian-wide interspersed repeat (MIR)-derived enhancers and the  
591 regulation of human gene expression. *Mobile DNA* 5: 14.

592 Ernst J, Kheradpour P, Mikkelsen TS, Shores N, Ward LD, et al. (2011) Mapping  
593 and analysis of chromatin state dynamics in nine human cell types. *Nature* 473:  
594 43-49.

595 McCue AD and Slotkin RK (2012) Transposable element small RNAs as  
596 regulators of gene expression. *Trends in genetics : TIG* 28: 616-623.

597 Gong C and Maquat LE (2011) lncRNAs transactivate STAU1-mediated mRNA  
598 decay by duplexing with 3' UTRs via Alu elements. *Nature* 470: 284-288.

599 Krull M, Petrusma M, Makalowski W, Brosius J and Schmitz J (2007) Functional  
600 persistence of exonized mammalian-wide interspersed repeat elements (MIRs).  
601 *Genome research* 17: 1139-1145.

602 Belancio VP, Hedges DJ and Deininger P (2006) LINE-1 RNA splicing and  
603 influences on mammalian gene expression. *Nucleic acids research* 34: 1512-  
604 1521.

605 Belancio VP, Roy-Engel AM and Deininger P (2008) The impact of multiple  
606 splice sites in human L1 elements. *Gene* 411: 38-45.

607 Cenik C, Chua HN, Zhang H, Tarnawsky SP, Akef A, et al. (2011) Genome  
608 analysis reveals interplay between 5'UTR introns and nuclear mRNA export for  
609 secretory and mitochondrial genes. *PLoS genetics* 7: e1001366.

610 Cenik C, Derti A, Mellor JC, Berriz GF and Roth FP (2010) Genome-wide  
611 functional analysis of human 5' untranslated region introns. *Genome biology*  
612 11: R29.

613 Slotkin RK and Martienssen R (2007) Transposable elements and the  
614 epigenetic regulation of the genome. *Nature reviews Genetics* 8: 272-285.

615 Barrett LW, Fletcher S and Wilton SD (2012) Regulation of eukaryotic gene  
616 expression by the untranslated gene regions and other non-coding elements.  
617 *Cellular and molecular life sciences : CMLS* 69: 3613-3634.

618 Faulkner GJ, Kimura Y, Daub CO, Wani S, Plessy C, et al. (2009) The regulated  
619 retrotransposon transcriptome of mammalian cells. *Nature genetics* 41: 563-  
620 571.

621 Engreitz JM, Pandya-Jones A, McDonel P, Shishkin A, Sirokman K, et al. (2013)  
622 The Xist lncRNA exploits three-dimensional genome architecture to spread  
623 across the X chromosome. *Science* 341: 1237973.

- 624 Kim DD, Kim TT, Walsh T, Kobayashi Y, Matisse TC, et al. (2004) Widespread  
625 RNA editing of embedded alu elements in the human transcriptome. *Genome*  
626 *research* 14: 1719-1725.
- 627 Levanon EY, Eisenberg E, Yelin R, Nemzer S, Hallegger M, et al. (2004)  
628 Systematic identification of abundant A-to-I editing sites in the human  
629 transcriptome. *Nature biotechnology* 22: 1001-1005.
- 630 Lin L, Jiang P, Shen S, Sato S, Davidson BL, et al. (2009) Large-scale analysis of  
631 exonized mammalian-wide interspersed repeats in primate genomes. *Human*  
632 *molecular genetics* 18: 2204-2214.
- 633 Lavie L, Maldener E, Brouha B, Meese EU and Mayer J (2004) The human L1  
634 promoter: variable transcription initiation sites and a major impact of  
635 upstream flanking sequence on promoter activity. *Genome research* 14: 2253-  
636 2260.
- 637 Eller CD, Regelson M, Merriman B, Nelson S, Horvath S, et al. (2007) Repetitive  
638 sequence environment distinguishes housekeeping genes. *Gene* 390: 153-165.
- 639 Cohen CJ, Lock WM and Mager DL (2009) Endogenous retroviral LTRs as  
640 promoters for human genes: a critical assessment. *Gene* 448: 105-114.
- 641 Bellone RR, Holl H, Setaluri V, Devi S, Maddodi N, et al. (2013) Evidence for a  
642 retroviral insertion in TRPM1 as the cause of congenital stationary night  
643 blindness and leopard complex spotting in the horse. *PloS one* 8: e78280.
- 644 Guntaka RV (1993) Transcription termination and polyadenylation in  
645 retroviruses. *Microbiological reviews* 57: 511-521.
- 646 Deininger PL and Batzer MA (2002) Mammalian retroelements. *Genome*  
647 *research* 12: 1455-1465.
- 648 Lee JY, Ji Z and Tian B (2008) Phylogenetic analysis of mRNA polyadenylation  
649 sites reveals a role of transposable elements in evolution of the 3'-end of genes.  
650 *Nucleic acids research* 36: 5581-5590.
- 651 Lewis BP, Green RE and Brenner SE (2003) Evidence for the widespread  
652 coupling of alternative splicing and nonsense-mediated mRNA decay in  
653 humans. *Proceedings of the National Academy of Sciences of the United States*  
654 *of America* 100: 189-192.
- 655 Callicott JH, Straub RE, Pezawas L, Egan MF, Mattay VS, et al. (2005) Variation in  
656 DISC1 affects hippocampal structure and function and increases risk for  
657 schizophrenia. *Proceedings of the National Academy of Sciences of the United*  
658 *States of America* 102: 8627-8632.
- 659 Rapoport JL, Addington AM, Frangou S and Psych MR (2005) The  
660 neurodevelopmental model of schizophrenia: update 2005. *Molecular*  
661 *psychiatry* 10: 434-449.
- 662 Pacanowski MA, Zineh I, Cooper-Dehoff RM, Pepine CJ and Johnson JA (2009)  
663 Genetic and pharmacogenetic associations between NOS3 polymorphisms,  
664 blood pressure, and cardiovascular events in hypertension. *American journal of*  
665 *hypertension* 22: 748-753.

666 Hingorani AD, Liang CF, Fatibene J, Lyon A, Monteith S, et al. (1999) A common  
667 variant of the endothelial nitric oxide synthase (Glu298-->Asp) is a major risk  
668 factor for coronary artery disease in the UK. *Circulation* 100: 1515-1520.

669 Nekrutenko A and Li WH (2001) Transposable elements are found in a large  
670 number of human protein-coding genes. *Trends in genetics* : TIG 17: 619-621.

671 R Core Team (2014) R : A language and environment for statistical computing.  
672 Vienna, Austria: R Foundation for Statistical Computing.

673 Quinlan AR and Hall IM (2010) BEDTools: a flexible suite of utilities for  
674 comparing genomic features. *Bioinformatics* 26: 841-842.

675 Dreszer TR, Karolchik D, Zweig AS, Hinrichs AS, Raney BJ, et al. (2012) The  
676 UCSC Genome Browser database: extensions and updates 2011. *Nucleic acids*  
677 *research* 40: D918-923.

678 Kent WJ, Sugnet CW, Furey TS, Roskin KM, Pringle TH, et al. (2002) The human  
679 genome browser at UCSC. *Genome research* 12: 996-1006.

680 Trapnell C, Roberts A, Goff L, Pertea G, Kim D, et al. (2012) Differential gene and  
681 transcript expression analysis of RNA-seq experiments with TopHat and  
682 Cufflinks. *Nature protocols* 7: 562-578.

683 Wickham H (2009) ggplot2: elegant graphics for data analysis. Springer New  
684 York.

685 Pruitt KD, Tatusova T and Maglott DR (2007) NCBI reference sequences  
686 (RefSeq): a curated non-redundant sequence database of genomes, transcripts  
687 and proteins. *Nucleic acids research* 35: D61-65.

688 Jurka J, Kapitonov VV, Pavlicek A, Klonowski P, Kohany O, et al. (2005) Repbase  
689 Update, a database of eukaryotic repetitive elements. *Cytogenetic and genome*  
690 *research* 110: 462-467.

691 Kohany O, Gentles AJ, Hankus L and Jurka J (2006) Annotation, submission and  
692 screening of repetitive elements in Repbase: RepbaseSubmitter and Censor.  
693 *BMC bioinformatics* 7: 474.

694 Meyer LR, Zweig AS, Hinrichs AS, Karolchik D, Kuhn RM, et al. (2013) The UCSC  
695 Genome Browser database: extensions and updates 2013. *Nucleic acids*  
696 *research* 41: D64-69.

697 Zeileis A (2004) Econometric Computing with HC and HAC Covariance Matrix  
698 Estimators. *Journal of Statistical Software* 11(10): 1-17.

699 Westfall THaFBaP (2008) Simultaneous Inference in General Parametric  
700 Models. *Biometrical Journal* 50: 346--363.

701 Bolger AM, Lohse M and Usadel B (2014) Trimmomatic: a flexible trimmer for  
702 Illumina sequence data. *Bioinformatics* 30: 2114-2120.

703 Li B and Dewey CN (2011) RSEM: accurate transcript quantification from RNA-  
704 Seq data with or without a reference genome. *BMC bioinformatics* 12: 323.

705 Cabili MN, Trapnell C, Goff L, Koziol M, Tazon-Vega B, et al. (2011) Integrative  
706 annotation of human large intergenic noncoding RNAs reveals global properties  
707 and specific subclasses. *Genes & development* 25: 1915-1927.

708 Dennis G, Jr., Sherman BT, Hosack DA, Yang J, Gao W, et al. (2003) DAVID:  
709 Database for Annotation, Visualization, and Integrated Discovery. *Genome*  
710 *biology* 4: P3.

711

712



**Repeat Type** Shared Specific

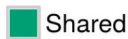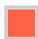

Specific

Proportion of bases

0.4  
0.2  
0.0

5'UTR  
exon

5'UTR  
intron

CDS  
exon

CDS  
intron

3'UTR  
exon

3'UTR  
intron

Intergenic

Region

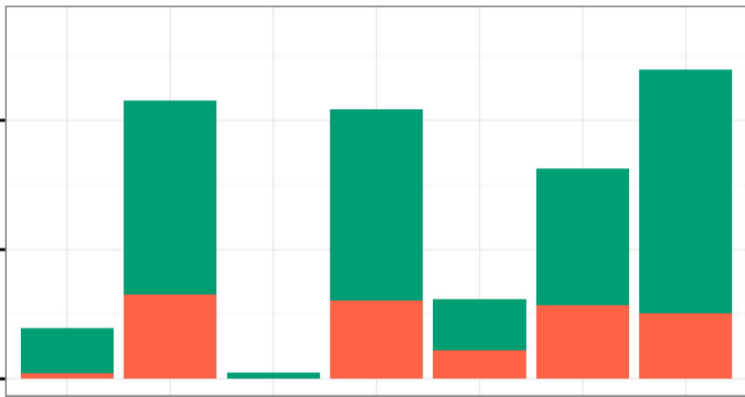

A

Region 5'UTR CDS exon CDS intron 3'UTR Intergenic

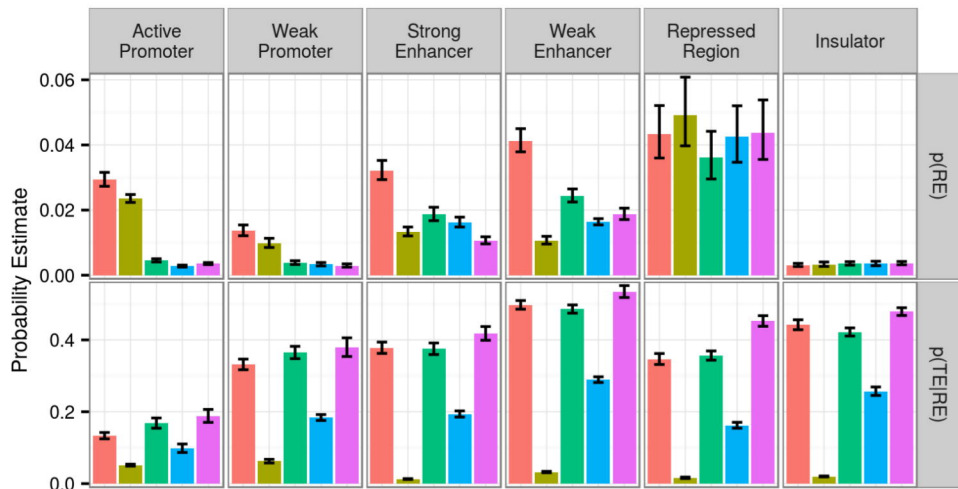

B

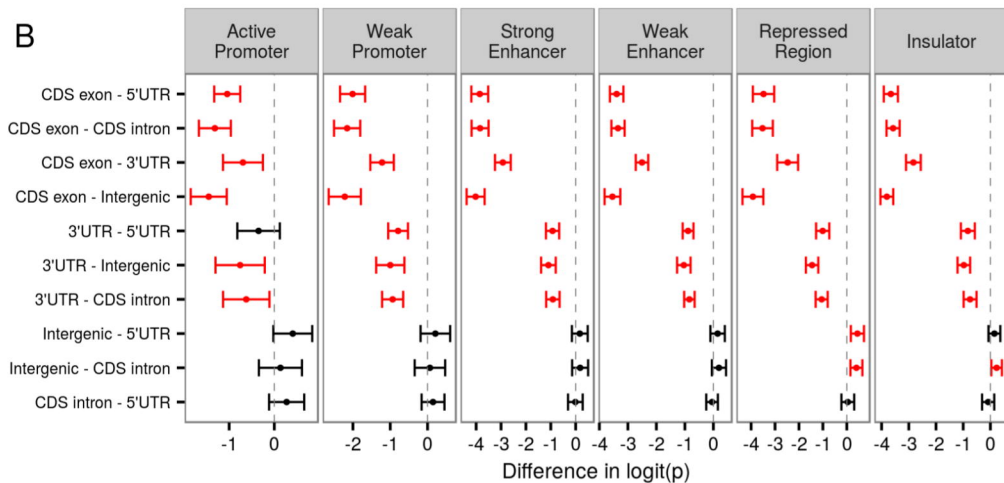

A

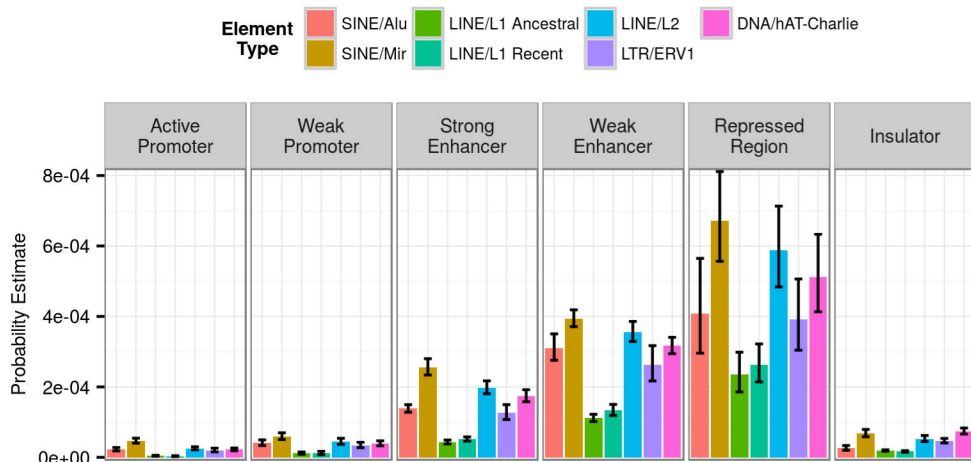

B

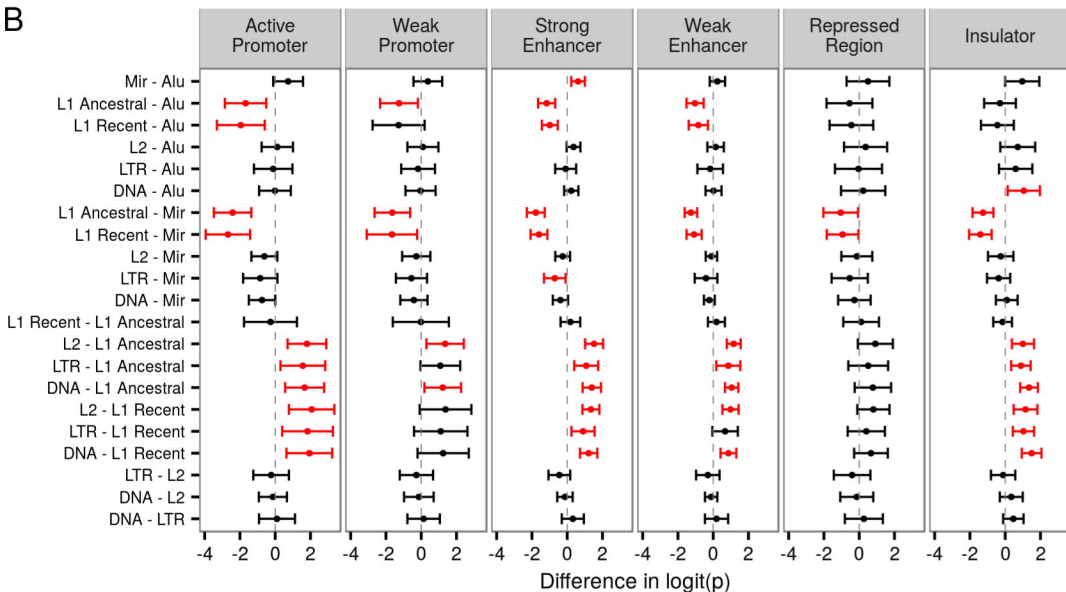

A

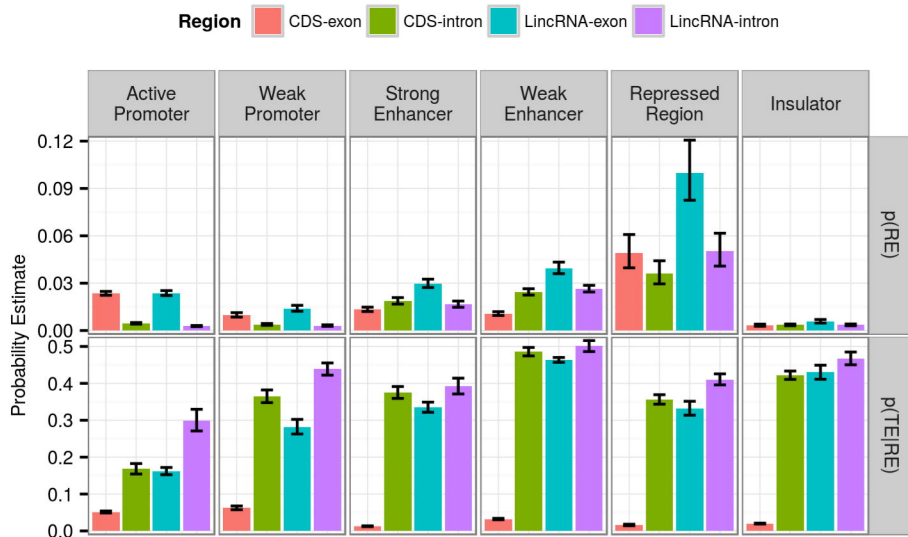

B

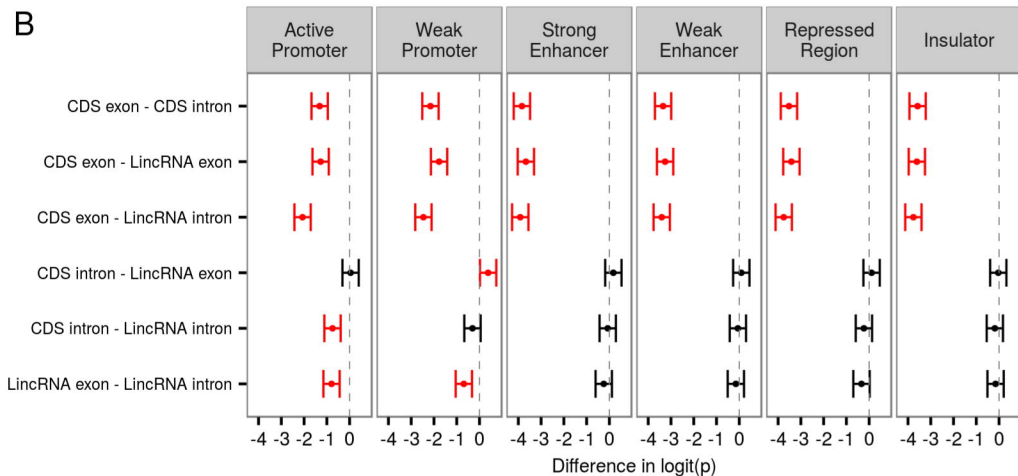

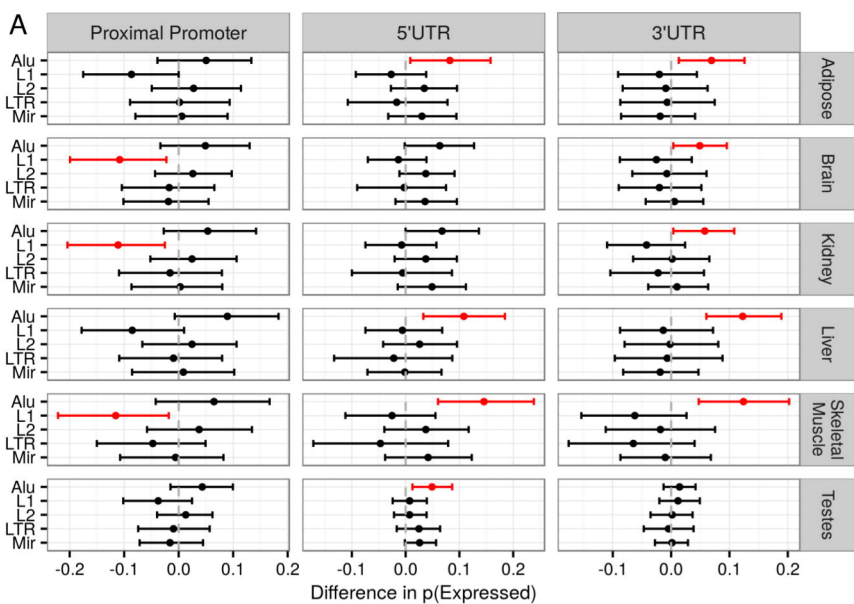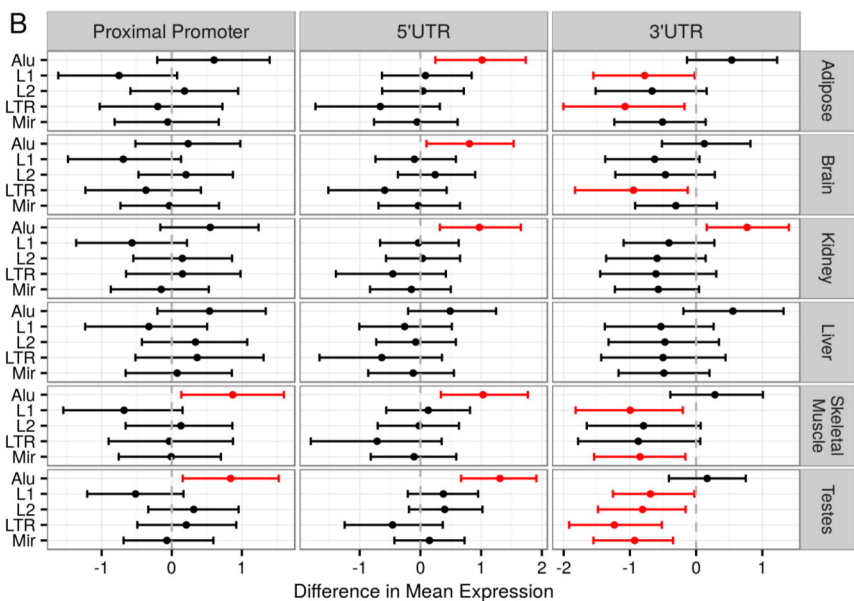

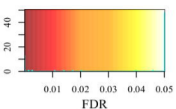

## Biological Process

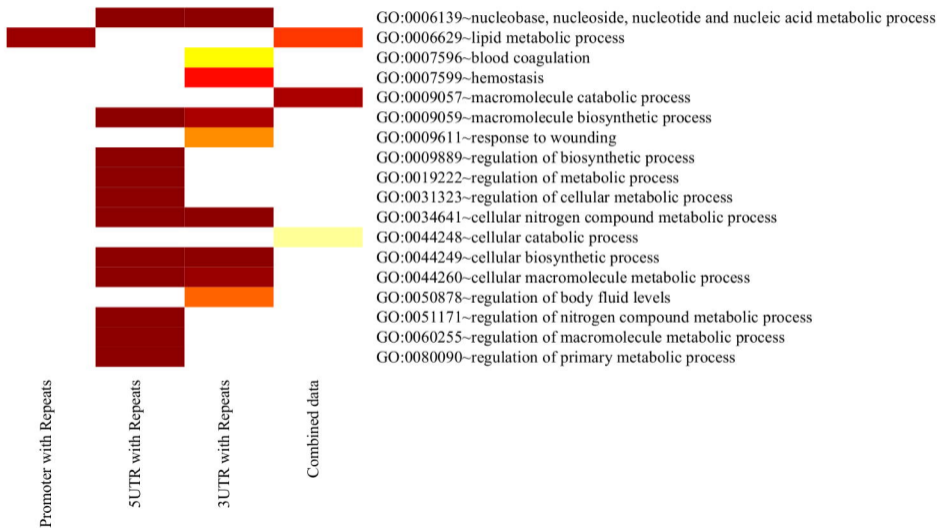

Source: http://www.biorxiv.org/content/10.1101/142018v1.full.pdf
